# Supplementary material for: The association between disability progression, relapses, and treatment in early relapse onset MS: an observational, multi-centre, longitudinal cohort study
Source: PubMed Central journal article supplement (PMC10354053; doi:10.1038/s41598-023-38415-z), 2023-07-18
Supplement: 41598_2023_38415_MOESM2_ESM.pdf [file 41598_2023_38415_MOESM2_ESM.pdf]

# The association between disability progression, relapses, and treatment in early relapse onset MS: an observational, multi-centre, longitudinal cohort study.

Valery Fuh Ngwa  
valeryfuh.ngwa@utas.edu.au

January 29, 2023

## 1 R-Codes for fitting a current value and slope CCJM adjusted for VitD and DDMT

This gives the estimates presented on Table 1 (see "VitDxDDMT-adjusted" column)

```
#####  
##Step 1: Fit a Bayesian Linear Mixed model to  
##      predict the evolution of WS-GPI and RS-GPI  
#####  
  
###Specify Cubic Spline parameters  
(qt1=quantile(xLong$Obstime, c(0.33, 0.66));range(xLong$Obstime)  
w0<-c("ns(Obstime, 3)", "(ns(Obstime,3)|auslongid)" )  
r0<-c("ns(Obstime, 3)", "(ns(Obstime,3)|auslongid)" )  
  
##Specify response variables  
#####  
resvar1<-"WS-GPI"  
resvar2<-"RS-GPI"  
  
##Model formulas  
formW<-as.formula(paste(resvar1, paste(w0, collapse=" + "), sep=" ~"))  
formR<-as.formula(paste(resvar2, paste(r0, collapse=" + "), sep=" ~"))  
  
###Set option for parallel processing  
options(mc.cores = parallel::detectCores()-2)
```

```

### Fit models
lmeFitW0<- mvglmer(list(formW),
                    data = xLong,
                    families = list(gaussian),engine = "JAGS")
lmeFitR0<- mvglmer(list(formR),
                    data = xLong,
                    families = list(gaussian),engine = "JAGS")

#####
### Step 2: Fit Robust Anderson-Gill Survival submodels
##           RRE = relapse status
##           WoD = worsening status
#####

CoxREL <- coxph(Surv(timeR, RRE) ~ Sex+I(Age)+BMI+Relcount+T2L+VitD+cluster(site),
                robust = TRUE, data = xSurv,
                model = TRUE, x=TRUE)

CoxWDS <- coxph(Surv(timeW, WoD) ~ Sex+I(Age)+BMI+Relcount+T2L+VitD+cluster(site),
                robust = TRUE, data = xSurv,
                model = TRUE, x=TRUE)

#####
### Step 3: Fit CCJM models to estimate association parameters
#####

##Define derivative forms
dForm1 <- list("WS-GPI" = list(name="value"),
              "WS-GPI" = list(name="slope",
                              fixed = ~ -1 + dns(Obstime, 3),
                              indFixed=2:4,
                              random = ~ -1 + dns(Obstime, 3),
                              indRandom=1:3))

dForm2 <- list("RS-GPI" = list(name="value"),
              "RS-GPI" = list(name="slope",
                              fixed = ~ -1 + dns(Obstime, 3),
                              indFixed=2:4,
                              random = ~ -1 + dns(Obstime, 3),
                              indRandom=1:3))

```

```

### First fit Current value model only

JMFitR.cv<-mvJointModelBayes(lmeFitW0, CoxREL, timeVar="Obstime") ##relapse risk
JMFitW.cv<-mvJointModelBayes(lmeFitR0, CoxWDS, timeVar="Obstime") ##worsening risk

### Now fit current value and slope model by updating the current value models

JMFitR.cvs <- update(JMFitR.cv, Formulas = dForm1) ##relapse risk
JMFitW.cvs <- update(JMFitW.cv, Formulas = dForm2) ##worsening risk

### Lastly, add interaction between the (RS)WS-GPI and DDMT
#####
### DDMTC1: 1 = Yes, 0 = No
### DDMTC3: 1 = yes, 0 = No
#####

IntW<-list("WS-GPI_value" = ~DDMTC1+DDMTC3, "WS-GPI_slope" =~DDMTC1+DDMTC3)
IntR<-list("RS-GPI_value" = ~DDMTC1+DDMTC3, "RS-GPI_slope" =~DDMTC1+DDMTC3)

##set priors for shrinking

priors = list(shrink_alphas = TRUE, shrink_gammas = TRUE)

##Now update the Current value and slope models

JMFitR.cvs.dmt<-update(JMFitR.cvs, Interactions=IntW, priors = priors) ##relapse risk
JMFitW.cvs.dmt<-update(JMFitW.cvs, Interactions=IntR, priors = priors) ##worsening risk

#####
## Posterior summary measures shown on the Table 3
## Current Value + Slope with no DMT adjustment
## Survival process: Using WS-GPI to predict Relapse risk
#####
>summary(JMFitW.cvs)

Call:
mvJointModelBayes(mvglmerObject = lmeFitW0, survObject = CoxREL,
  timeVar = "Obstime", Formulas = dForm1)

Data Descriptives:
Number of Groups: 253 Number of events: 43 (17%)
Number of Observations:

```

biomrkW: 2453

Random-effects covariance matrix:

|         | StdDev | Corr    |         |         |
|---------|--------|---------|---------|---------|
| (I)1    | 0.6307 | (Int)1  | n(0,3)1 | n(0,3)2 |
| n(0,3)1 | 0.2146 | -0.8093 |         |         |
| n(0,3)2 | 1.2416 | -0.9236 | 0.7734  |         |
| n(0,3)3 | 0.2570 | -0.8214 | 0.7509  | 0.8330  |

Survival Outcome: RRE

|               | PostMean | StDev  | StErr  | 2.5%    | 97.5%   | P |
|---------------|----------|--------|--------|---------|---------|---|
| SexMale       | -0.4707  | 0.4185 | 0.0132 | -0.4967 | -0.4446 | 0 |
| I(Age)        | 0.0091   | 0.0171 | 0.0005 | 0.0082  | 0.0101  | 0 |
| BMI           | -0.1136  | 0.9517 | 0.0229 | -0.1586 | -0.0686 | 0 |
| RelCont       | 0.3117   | 0.1879 | 0.0044 | 0.3030  | 0.3203  | 0 |
| T2L           | 0.1819   | 0.3363 | 0.0142 | 0.1539  | 0.2099  | 0 |
| VitD[Yes]     | -0.1800  | 0.2311 | 0.0310 | -0.2410 | -0.1184 | 0 |
| biomrkW_value | 0.9187   | 0.4835 | 0.0135 | 0.8921  | 0.9452  | 0 |
| biomrkW_slope | 0.8952   | 4.5345 | 0.1234 | 0.6522  | 1.1383  | 0 |

Longitudinal Outcome: biomrkW (family = gaussian, link = identity)

|                 | PostMean | StDev  | StErr  | 2.5%    | 97.5%   | P |
|-----------------|----------|--------|--------|---------|---------|---|
| (Intercept)     | 1.6830   | 0.0533 | 0.0017 | 1.5798  | 1.7888  | 0 |
| ns(Obstime, 3)1 | -0.5801  | 0.0315 | 0.0017 | -0.6403 | -0.5176 | 0 |
| ns(Obstime, 3)2 | -1.6312  | 0.1217 | 0.0041 | -1.8710 | -1.3958 | 0 |
| ns(Obstime, 3)3 | -0.5588  | 0.0535 | 0.0032 | -0.6655 | -0.4559 | 0 |
| sigma           | 0.3019   | 0.0050 | 0.0002 | 0.2919  | 0.3115  | 0 |

MCMC summary:

iterations: 5000  
burn-in: 5000  
thinning: 1  
time: 3.5 min

```
#####  
## Posterior summary measures shown on the Table 3  
## Current Value + Slope with DMT adjustment  
## Survival process: Using WS-GPI to predict Relapse risk  
#####  
>summary(JMFitW.cvs.dmt)
```

Call:

```
mvJointModelBayes(mvglmerObject = lmeFitW0, survObject = CoxREL,  
  timeVar = "Obstime", Formulas = dForm1, Interactions = Int3,  
  priors = priors)
```

Data Descriptives:

Number of Groups: 253 Number of events: 43 (17%)

Number of Observations:

biomrkW: 2453

Random-effects covariance matrix:

|         | StdDev | Corr    |        |                 |
|---------|--------|---------|--------|-----------------|
| (I)1    | 0.6307 |         | (Int)1 | n(0,3)1 n(0,3)2 |
| n(0,3)1 | 0.2146 | -0.8093 |        |                 |
| n(0,3)2 | 1.2416 | -0.9236 | 0.7734 |                 |
| n(0,3)3 | 0.2570 | -0.8214 | 0.7509 | 0.8330          |

Survival Outcome: RRE

|                        | PostMean | StDev  | StErr  | 2.5%    | 97.5%   | P     |
|------------------------|----------|--------|--------|---------|---------|-------|
| SexMale                | -0.1864  | 0.2797 | 0.0094 | -0.2049 | -0.1678 | 0.000 |
| I(Age)                 | -0.0145  | 0.0155 | 0.0005 | -0.0156 | -0.0134 | 0.000 |
| BMI                    | 0.3738   | 0.5049 | 0.0263 | 0.3220  | 0.4255  | 0.000 |
| RelCont                | 0.3902   | 0.1716 | 0.0059 | 0.3786  | 0.4018  | 0.000 |
| T2L                    | 0.0199   | 0.1823 | 0.0058 | 0.0085  | 0.0313  | 0.001 |
| VitD[Yes]              | -0.1700  | 0.2310 | 0.0211 | -0.2117 | -0.1286 | 0.000 |
| biomrkW_value          | 1.0864   | 0.3271 | 0.0091 | 1.0684  | 1.1045  | 0.000 |
| biomrkW_value:DMTDTxC1 | -0.3872  | 2.4801 | 0.0784 | -0.5417 | -0.2327 | 0.000 |
| biomrkW_value:DMTDTxC3 | -0.9844  | 2.5295 | 0.0800 | -1.1420 | -0.8268 | 0.000 |
| biomrkW_slope          | 1.2070   | 2.3183 | 0.0733 | 1.0626  | 1.3514  | 0.000 |
| biomrkW_slope:DMTDTxC1 | -0.6478  | 3.9787 | 0.1172 | -0.8787 | -0.4168 | 0.000 |
| biomrkW_slope:DMTDTxC3 | -0.6587  | 4.0976 | 0.1296 | -0.9140 | -0.4034 | 0.000 |

Longitudinal Outcome: biomrkW (family = gaussian, link = identity)

|                 | PostMean | StDev  | StErr  | 2.5%    | 97.5%   | P |
|-----------------|----------|--------|--------|---------|---------|---|
| (Intercept)     | 1.6830   | 0.0533 | 0.0017 | 1.5798  | 1.7888  | 0 |
| ns(Obstime, 3)1 | -0.5801  | 0.0315 | 0.0017 | -0.6403 | -0.5176 | 0 |
| ns(Obstime, 3)2 | -1.6312  | 0.1217 | 0.0041 | -1.8710 | -1.3958 | 0 |
| ns(Obstime, 3)3 | -0.5588  | 0.0535 | 0.0032 | -0.6655 | -0.4559 | 0 |
| sigma           | 0.3019   | 0.0050 | 0.0002 | 0.2919  | 0.3115  | 0 |

MCMC summary:

iterations: 5000

burn-in: 5000

thinning: 1

time: 4.6 min

```
#####  
## Posterior summary measures shown on the Table 3  
## Current Value + Slope with no DMT adjustment  
## Survival process: Using RS-GPI to predict worsening risk  
#####
```

```

> summary(JMFitR.cvs)

Call:
mvJointModelBayes(mvglmerObject = lmeFitR0, survObject = CoxWDS,
  timeVar = "Obstime", Formulas = dForm2)

Data Descriptives:
Number of Groups: 253 Number of events: 44 (17.4%)
Number of Observations:
  biomrkR: 2453

Random-effects covariance matrix:
      StdDev   Corr
(I)1    0.3838 (Int)1 n(0,3)1 n(0,3)2
n(0,3)1 0.1640 -0.1778
n(0,3)2 0.6543 -0.3829 0.0814
n(0,3)3 0.3282 -0.0674 -0.1567 -0.0186

Survival Outcome: WoD
      PostMean StDev StErr  2.5%  97.5% P
SexMale      -1.9082 0.6361 0.0202 -1.9480 -1.8684 0
I(Age)       -0.0140 0.0152 0.0005 -0.0150 -0.0130 0
BMI           0.0246 0.0248 0.0012  0.0223  0.0270 0
RelCont       0.0802 0.2667 0.0069  0.0665  0.0939 0
T2L           0.9487 0.4123 0.0145  0.9201  0.9773 0
VitD[Yes]    -0.0510 0.1310 0.0132 -0.0773 -0.0254 0
biomrkR_value 1.5126 0.9396 0.0388  1.4360  1.5891 0
biomrkR_slope -2.5165 7.9384 0.3768 -3.2588 -1.7743 0

Longitudinal Outcome: biomrkR (family = gaussian, link = identity)
      PostMean StDev StErr  2.5%  97.5%  P
(Intercept)    1.1834 0.0736 0.0043  1.0444  1.3305 0.000
ns(Obstime, 3)1 -0.1998 0.0647 0.0062 -0.3245 -0.0708 0.004
ns(Obstime, 3)2 -0.2479 0.1875 0.0129 -0.6253  0.1108 0.186
ns(Obstime, 3)3  0.0028 0.1088 0.0084 -0.2210  0.2050 0.938
sigma           0.7249 0.0114 0.0004  0.7026  0.7464 0.000

MCMC summary:
iterations: 5000
burn-in: 5000
thinning: 1
time: 3.5 min

#####
## Posterior summary measures shown on the Table 3

```

```
## Current Value + Slope with DMT adjustment
## Survival process: Using RS-GPI to predict worsening risk
#####
> summary(JMFit2.cvs.dmt)
```

```
Call:
mvJointModelBayes(mvglmerObject = lmeFitR0, survObject = CoxWDS,
  timeVar = "Obstime", Formulas = dForm2, Interactions = Int4,
  priors = priors)
```

```
Data Descriptives:
Number of Groups: 253 Number of events: 44 (17.4%)
Number of Observations:
  biomrkR: 2453
```

```
Random-effects covariance matrix:
      StdDev   Corr
(Int)1 0.3838 (Int)1 n(0,3)1 n(0,3)2
n(0,3)1 0.1640 -0.1778
n(0,3)2 0.6543 -0.3829 0.0814
n(0,3)3 0.3282 -0.0674 -0.1567 -0.0186
```

```
Survival Outcome: WoD
```

|                        | PostMean | StDev  | StErr  | 2.5%    | 97.5%   | P     |
|------------------------|----------|--------|--------|---------|---------|-------|
| SexMale                | -1.4307  | 0.6606 | 0.0209 | -1.4719 | -1.3896 | 0.000 |
| I(Age)                 | -0.0148  | 0.0135 | 0.0004 | -0.0155 | -0.0140 | 0.000 |
| BMI                    | 0.0183   | 0.0234 | 0.0007 | 0.0169  | 0.0198  | 0.000 |
| RelCont                | -0.0048  | 0.1492 | 0.0047 | -0.0141 | 0.0045  | 0.310 |
| T2L                    | 0.6134   | 0.3906 | 0.0132 | 0.5874  | 0.6394  | 0.000 |
| VitD[Yes]              | -0.0813  | 0.1411 | 0.0131 | -0.1070 | -0.0556 | 0.000 |
| biomrkR_value          | 1.2382   | 0.7051 | 0.0235 | 1.1920  | 1.2844  | 0.000 |
| biomrkR_value:DMTDxC1  | -0.3022  | 1.0079 | 0.0319 | -0.3649 | -0.2394 | 0.000 |
| biomrkR_value:DMTDxC3  | -0.1104  | 0.9246 | 0.0279 | -0.1654 | -0.0554 | 0.000 |
| biomrkR_slope          | -1.5799  | 4.8169 | 0.1523 | -1.8799 | -1.2798 | 0.000 |
| biomrkR_slope:DMTDTxC1 | 0.4427   | 9.5341 | 0.3015 | -0.1513 | 1.0366  | 0.142 |
| biomrkR_slope:DMTDTxC3 | 0.3653   | 8.9423 | 0.2828 | -0.1918 | 0.9223  | 0.196 |

```
Longitudinal Outcome: biomrkR (family = gaussian, link = identity)
```

|                 | PostMean | StDev  | StErr  | 2.5%    | 97.5%   | P     |
|-----------------|----------|--------|--------|---------|---------|-------|
| (Intercept)     | 1.1834   | 0.0736 | 0.0043 | 1.0444  | 1.3305  | 0.000 |
| ns(Obstime, 3)1 | -0.1998  | 0.0647 | 0.0062 | -0.3245 | -0.0708 | 0.004 |
| ns(Obstime, 3)2 | -0.2479  | 0.1875 | 0.0129 | -0.6253 | 0.1108  | 0.186 |
| ns(Obstime, 3)3 | 0.0028   | 0.1088 | 0.0084 | -0.2210 | 0.2050  | 0.938 |
| sigma           | 0.7249   | 0.0114 | 0.0004 | 0.7026  | 0.7464  | 0.000 |

```
MCMC summary:
```

iterations: 5000  
burn-in: 5000  
thinning: 1  
time: 4.5 min



## 2 Additional Tables and Figures

Table S1. Cross-validated dynamic AUC and prediction errors (PE) for the CCJM and VCJM for different functional forms. Performance was assessed at median follow-up times  $t = 2.5, 5,$  and  $7.5$  years, and a medically-relevant window of  $2.5$  years. The results are based on a 5 fold Monte-Carlo cross-validation repeated 20 times.

|                                               |                    | CCJM           |               | VCJM           |               |
|-----------------------------------------------|--------------------|----------------|---------------|----------------|---------------|
| <i>t</i> (yrs)                                | Functional Forms   | AUC( $t+2.5$ ) | PE( $t+2.5$ ) | AUC( $t+2.5$ ) | PE( $t+2.5$ ) |
| <b>Prediction of relapse risk</b>             |                    |                |               |                |               |
| <b>2.5</b>                                    | Value              | 0.6523         | 0.2213        | 0.8352         | 0.2066        |
|                                               | Value + Slope      | 0.6685         | 0.1183        | 0.9291         | 0.1086        |
|                                               | Cumulative effects | 0.6313         | 0.3235        | -              | -             |
| <b>5</b>                                      | Value              | 0.7024         | 0.2139        | 0.8853         | 0.1178        |
|                                               | Value + Slope      | 0.7245         | 0.1090        | 0.9851         | 0.0534        |
|                                               | Cumulative effects | 0.6697         | 0.4167        | -              | -             |
| <b>7.5</b>                                    | Value              | 0.7335         | 0.1598        | 0.9164         | 0.0913        |
|                                               | Value + Slope      | 0.6954         | 0.1019        | 0.9560         | 0.0659        |
|                                               | Cumulative effects | 0.6274         | 0.3410        | -              | -             |
| <b>Prediction of Worsening of disability.</b> |                    |                |               |                |               |
| <b>2.5</b>                                    | Value              | 0.7570         | 0.2278        | 0.7899         | 0.1792        |
|                                               | Value + Slope      | 0.7656         | 0.2277        | 0.8073         | 0.1798        |
|                                               | Cumulative effects | 0.7289         | 0.2747        | -              | -             |
| <b>5</b>                                      | Value              | 0.7932         | 0.2254        | 0.8493         | 0.1406        |
|                                               | Value + Slope      | 0.8020         | 0.2001        | 0.8587         | 0.1267        |
|                                               | Cumulative effects | 0.7376         | 0.2426        | -              | -             |
| <b>7.5</b>                                    | Value              | 0.8078         | 0.1505        | 0.9080         | 0.1078        |
|                                               | Value + Slope      | 0.8129         | 0.1152        | 0.9152         | 0.0987        |
|                                               | Cumulative effects | 0.7252         | 0.1513        | -              | -             |

NB: Since the cumulative effects functional form is not available under the VCJM, we considered only the value and value + slope functional forms.

Table S2. Selection of the mean component of the CCJM based on marginal and conditional DIC. The model with best fit has the smallest DIC value

| <i>Associations:</i><br>Model Info | <i>WS-GPI ↔ Relapse risk</i> |                 | <i>RS-GPI ↔ Worsening risk</i> |                 |
|------------------------------------|------------------------------|-----------------|--------------------------------|-----------------|
|                                    | Marginal DIC                 | Conditional DIC | Marginal DIC                   | Conditional DIC |
| Unadjusted                         | 2148.016                     | 951.915         | 5896.963                       | 4912.357        |
| VitD-adjusted                      | 2147.591                     | 934.046         | 5865.479                       | 4797.130        |
| DDMT-adjusted                      | 2150.751                     | 961.902         | 5890.886                       | 4843.224        |
| VitD×DDMT-adjusted                 | 2145.693                     | 946.708         | 5832.531                       | 4734.383        |

Table S3. Posterior means and 95% credible intervals (C.I) for the parameters describing the evolution of WS-GPI and RS-GPI non-linear cubic splines function of the follow-up time [ns(time, 3)] in the Bayesian mixed effects model.

| <b>Longitudinal process</b> |                      |                  |                      |                  |
|-----------------------------|----------------------|------------------|----------------------|------------------|
| Effects                     | WS-GPI ~ ns(time, 3) |                  | RS-GPI ~ ns(time, 3) |                  |
|                             | Estimate             | 95% C.I          | Estimate             | 95% C.I          |
| Intercept                   | 1.683                | (1.580; 1.789)   | 1.183                | (1.044; 1.331)   |
| ns(time, 3)1                | -0.580               | (-0.640; -0.518) | -0.200               | (-0.325; -0.071) |
| ns(time, 3)2                | -1.631               | (-1.871; -1.396) | -0.248               | (-0.625; 0.111)  |
| ns(time, 3)3                | -0.559               | (-0.665; -0.456) | 0.003                | (-0.221; 0.205)  |
| Error ( $\sigma$ )          | 0.302                | (0.292; 0.312)   | 0.725                | (0.703; 0.746)   |
| $\sigma_{b0}$               | 0.631                |                  | 0.384                |                  |
| $\sigma_{b11}$              | 0.215                |                  | 0.164                |                  |
| $\sigma_{b21}$              | 1.215                |                  | 0.654                |                  |
| $\sigma_{b31}$              | 0.257                |                  | 0.328                |                  |
| ICC                         | 0.886                |                  | 0.678                |                  |
| $pD$                        | 951.356              |                  | 548.398              |                  |
| $DIC$                       | 2034.825             |                  | 5928.552             |                  |
| $\overline{D(\theta)}$      | 1083.469             |                  | 5380.154             |                  |
| $D(\hat{\theta})$           | 132.113              |                  | 4831.756             |                  |
| $l(\theta)$                 | 7875.074             |                  | 14050.700            |                  |

**WS-GPI:** Observed value of the worsening-specific genetic prognostic index

**RS-GPI:** Observed values of relapse-specific genetic prognostic index.

**ns(time,3):** Non-linear spline function on the follow-up time.

**ICC=**Intra-class correlation;  **$pD$**  =effective degrees of freedom.

**$DIC$** = Deviance information criterion;  $\sigma_{(.)}$ = Variance of the random effects.

$\overline{D(\theta)}$  and  $D(\hat{\theta})$  are deviance parameters; and  $l(\theta)$  is the log-likelihood.

Table S4. VCJM results: Using the current value and current slope of the WS-GPI to predict the risk for relapse. Posterior means, 95% credible intervals and Gelman-Rubin's diagnostic (Rhat = potential scale reduction factor), are shown.

|                                                                           | Est    | SE    | 2.5%   | 97.5%  | Rhat |
|---------------------------------------------------------------------------|--------|-------|--------|--------|------|
| <b>Longitudinal process: WS-GPI ~ns(time, 3)</b>                          |        |       |        |        |      |
| Intercept                                                                 | 1.683  | 0.053 | 1.580  | 1.789  | 1.00 |
| ns(time, 3)1                                                              | -0.580 | 0.032 | -0.640 | -0.518 | 1.00 |
| ns(time, 3)2                                                              | -1.631 | 0.122 | -1.871 | -1.396 | 1.00 |
| ns(time, 3)3                                                              | -0.559 | 0.054 | -0.665 | -0.456 | 1.00 |
| Error ( $\sigma$ )                                                        | 0.302  | 0.005 | 0.292  | 0.312  | 1.00 |
| <b>Survival process: WS-GPI <math>\leftrightarrow</math> Relapse risk</b> |        |       |        |        |      |
| Sex(Male)                                                                 | -0.319 | 0.012 | -0.342 | -0.296 | 1.00 |
| Age at FDE                                                                | 0.002  | 0.001 | 0.000  | 0.004  | 1.00 |
| Body mass index                                                           | 0.627  | 0.014 | 0.600  | 0.654  | 1.00 |
| Relapse counts                                                            | 0.252  | 0.005 | 0.242  | 0.262  | 1.00 |
| T2 lesion counts                                                          | 0.167  | 0.009 | 0.149  | 0.185  | 1.00 |
| WS-GPI_Value[1]                                                           | -0.450 | 0.297 | -1.029 | 0.129  | 1.00 |
| WS-GPI_Value[2]                                                           | 0.111  | 0.119 | -0.121 | 0.343  | 1.00 |
| WS-GPI_Value[3]                                                           | 0.514  | 0.203 | 0.118  | 0.910  | 1.00 |
| WS-GPI_Value[4]                                                           | 1.161  | 0.306 | 0.565  | 1.761  | 1.00 |
| WS-GPI_Value[5]                                                           | 2.157  | 0.497 | 1.188  | 3.126  | 1.00 |
| WS-GPI_Value[6]                                                           | 2.796  | 0.676 | 1.478  | 4.114  | 1.00 |
| WS-GPI_Value[7]                                                           | 3.179  | 0.800 | 1.619  | 4.739  | 1.00 |
| WS-GPI_Value[8]                                                           | 3.621  | 0.818 | 2.025  | 5.216  | 1.00 |
| WS-GPI_Value[9]                                                           | 4.268  | 0.928 | 2.458  | 6.078  | 1.00 |
| WS-GPI_Value[10]                                                          | 5.064  | 1.192 | 2.740  | 7.388  | 1.00 |
| WS-GPI_Slope[1]                                                           | -0.910 | 0.189 | -1.279 | -0.541 | 1.00 |
| WS-GPI_Slope[2]                                                           | 0.684  | 0.213 | 0.269  | 1.099  | 1.00 |
| WS-GPI_Slope[3]                                                           | 1.702  | 0.364 | 0.992  | 2.412  | 1.00 |
| WS-GPI_Slope[4]                                                           | 2.678  | 0.582 | 1.543  | 3.813  | 1.00 |
| WS-GPI_Slope[5]                                                           | 3.622  | 0.805 | 2.052  | 5.192  | 1.00 |
| WS-GPI_Slope[6]                                                           | 4.546  | 1.141 | 2.321  | 6.771  | 1.00 |
| WS-GPI_Slope[7]                                                           | 5.461  | 1.451 | 2.631  | 8.291  | 1.00 |
| WS-GPI_Slope[8]                                                           | 6.379  | 1.733 | 2.999  | 9.759  | 1.00 |
| WS-GPI_Slope[9]                                                           | 7.304  | 2.003 | 3.398  | 11.210 | 1.00 |
| WS-GPI_Slope[10]                                                          | 8.237  | 2.219 | 3.909  | 12.564 | 1.00 |
| $DIC_{marginal} = 2144.07$                                                |        |       |        |        |      |
| $DIC_{conditional} = 926.40$                                              |        |       |        |        |      |

Table S5. VCJM results: Using the current value and current slope of the RS-GPI to predict the risk of worsening of disability. Posterior means, 95% credible intervals and Gelman-Rubin's diagnostic (Rhat = potential scale reduction factor), are shown.

|                                                                           | Est     | SE    | 2.5%    | 97.5%  | Rhat |
|---------------------------------------------------------------------------|---------|-------|---------|--------|------|
| <b>Longitudinal process: WS-GPI ~ns(time, 3)</b>                          |         |       |         |        |      |
| Intercept                                                                 | 1.183   | 0.074 | 1.044   | 1.331  | 1.00 |
| ns(time, 3)1                                                              | -0.200  | 0.065 | -0.325  | -0.071 | 1.00 |
| ns(time, 3)2                                                              | -0.248  | 0.188 | -0.625  | 0.111  | 1.00 |
| ns(time, 3)3                                                              | 0.003   | 0.109 | -0.221  | 0.205  | 1.00 |
| Error ( $\sigma$ )                                                        | 0.725   | 0.011 | 0.703   | 0.746  | 1.00 |
| <b>Survival process: WS-GPI <math>\leftrightarrow</math> Relapse risk</b> |         |       |         |        |      |
| Sex(Male)                                                                 | -1.726  | 0.608 | -2.912  | -0.540 | 1.00 |
| Age at FDE                                                                | -0.010  | 0.013 | -0.035  | 0.015  | 1.00 |
| Body mass index                                                           | 0.024   | 0.018 | -0.012  | 0.059  | 1.00 |
| Relapse counts                                                            | 0.164   | 0.248 | -0.319  | 0.648  | 1.00 |
| T2 lesion counts                                                          | 0.885   | 0.356 | 0.192   | 1.579  | 1.00 |
| RS-GPI_Value[1]                                                           | 3.863   | 0.768 | 2.366   | 5.361  | 1.00 |
| RS-GPI_Value[2]                                                           | 3.087   | 0.565 | 1.985   | 4.189  | 1.00 |
| RS-GPI_Value[3]                                                           | 2.284   | 0.450 | 1.407   | 3.162  | 1.00 |
| RS-GPI_Value[4]                                                           | 1.447   | 0.412 | 0.643   | 2.250  | 1.00 |
| RS-GPI_Value[5]                                                           | 0.592   | 0.475 | -0.335  | 1.518  | 1.00 |
| RS-GPI_Value[6]                                                           | -0.295  | 0.635 | -1.534  | 0.943  | 1.00 |
| RS-GPI_Value[7]                                                           | -1.227  | 0.852 | -2.888  | 0.434  | 1.00 |
| RS-GPI_Value[8]                                                           | -2.185  | 1.139 | -4.407  | 0.036  | 1.00 |
| RS-GPI_Value[9]                                                           | -3.144  | 1.471 | -6.013  | -0.276 | 1.00 |
| RS-GPI_Value[10]                                                          | -4.096  | 1.734 | -7.478  | -0.715 | 1.00 |
| RS-GPI_Slope[1]                                                           | 6.217   | 2.124 | 2.075   | 10.359 | 1.00 |
| RS-GPI_Slope[2]                                                           | 4.410   | 1.704 | 1.087   | 7.733  | 1.00 |
| RS-GPI_Slope[3]                                                           | 2.603   | 1.160 | 0.341   | 4.865  | 1.00 |
| RS-GPI_Slope[4]                                                           | 0.779   | 1.019 | -1.208  | 2.766  | 1.00 |
| RS-GPI_Slope[5]                                                           | -1.082  | 0.859 | -2.757  | 0.593  | 1.00 |
| RS-GPI_Slope[6]                                                           | -2.976  | 1.313 | -5.536  | -0.416 | 1.00 |
| RS-GPI_Slope[7]                                                           | -4.882  | 1.836 | -8.462  | -1.301 | 1.00 |
| RS-GPI_Slope[8]                                                           | -6.795  | 2.417 | -11.508 | -2.081 | 1.00 |
| RS-GPI_Slope[9]                                                           | -8.710  | 2.959 | -14.480 | -2.939 | 1.00 |
| RS-GPI_Slope[10]                                                          | -10.628 | 3.565 | -17.580 | -3.677 | 1.00 |
| $DIC_{marginal} = 5880.66$                                                |         |       |         |        |      |
| $DIC_{conditional} = 4904.76$                                             |         |       |         |        |      |

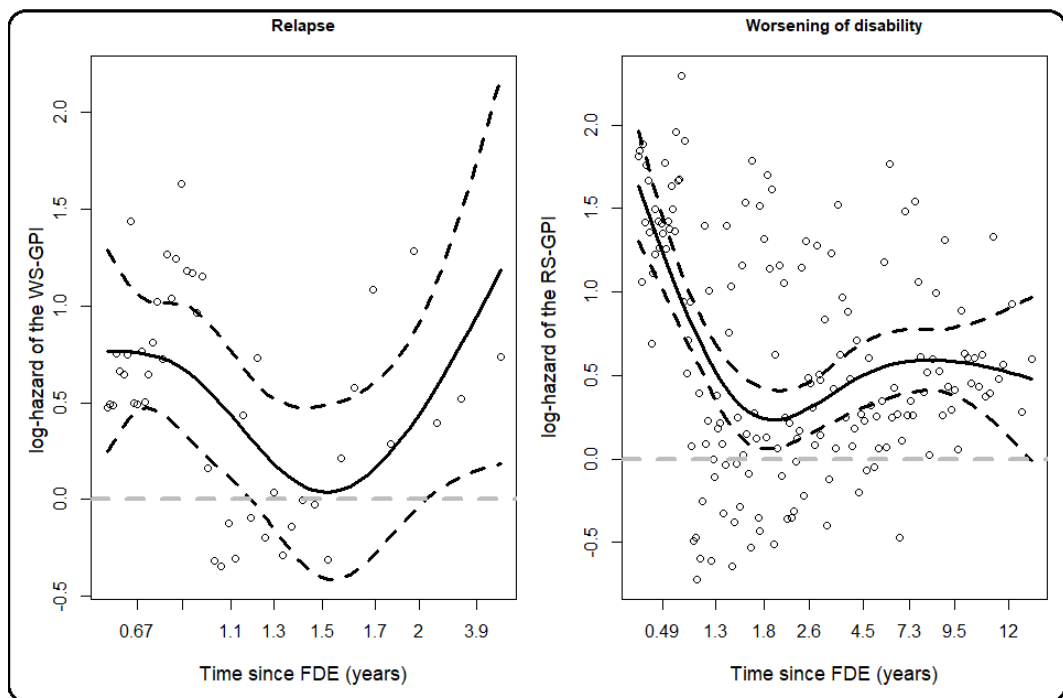

**Figure S1.** Time-varying coefficients of WS-GPI and RS-GPI, using Schoenfeld residuals. The solid line represents the mean estimate while the dotted lines are the confidence intervals. The dashed grey line represents the coefficient of WS-GPI and RS-GPI where the hazard is constant

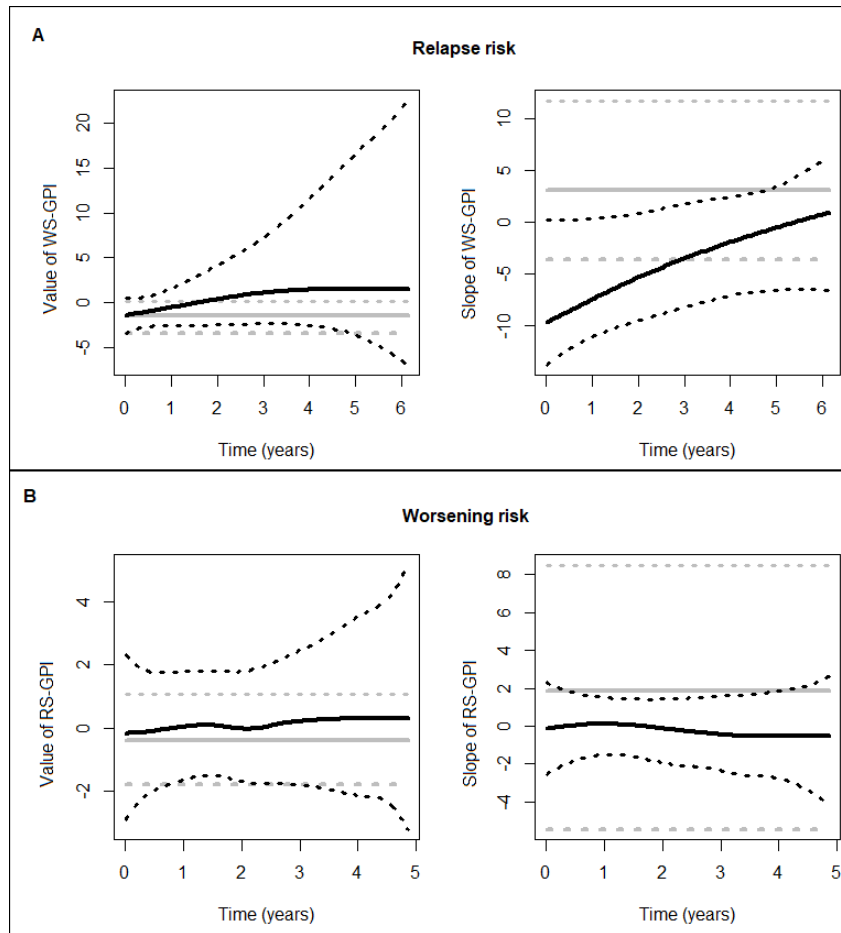

**Figure S2.** Time-dependent associations using invalid genetic instruments. The residual effects of worsening events on the risk for relapse (A), and the residual effects of relapses on the risk for worsening (B) are shown. These associations were obtained from genetic prognostic indices constructed using top 45 genome-wide SNPs that were not predictive of either endpoint. There is no significant association between relapses and worsening of disability in the presence of invalid SNP-outcome associations. These results do not invalidate our findings from Figure 2.

## Appendix C: Model Diagnostic Checks

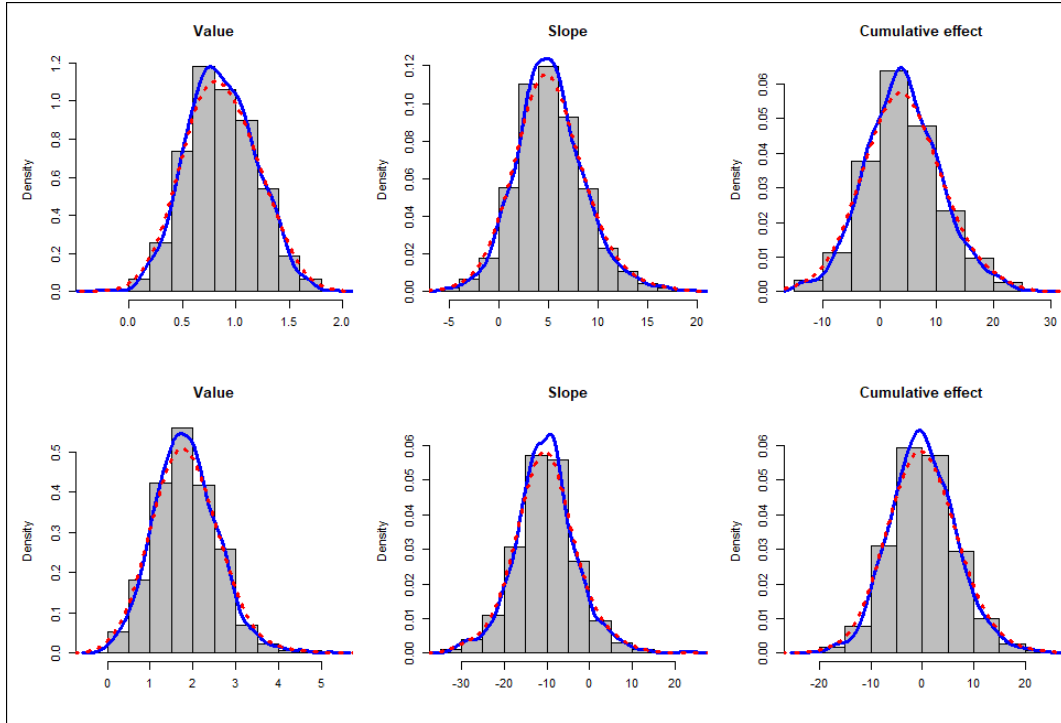

**Figure S3.** The posterior density of the association parameters in the constant coefficient joint models are normally distributed

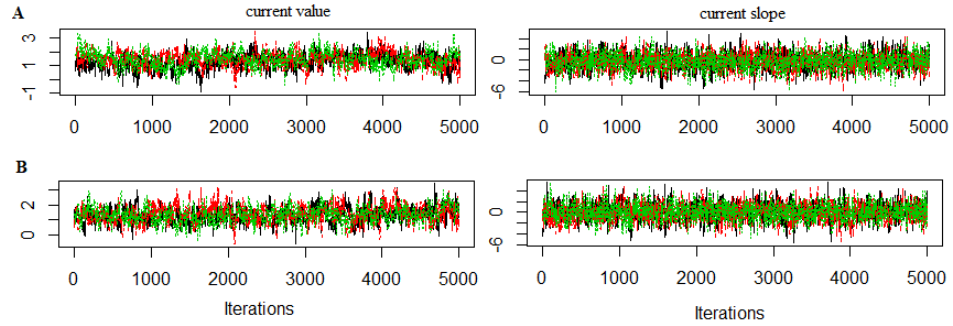

**Figure S4.** Trace plots of the association parameters indicate better mixing of the Markov chains

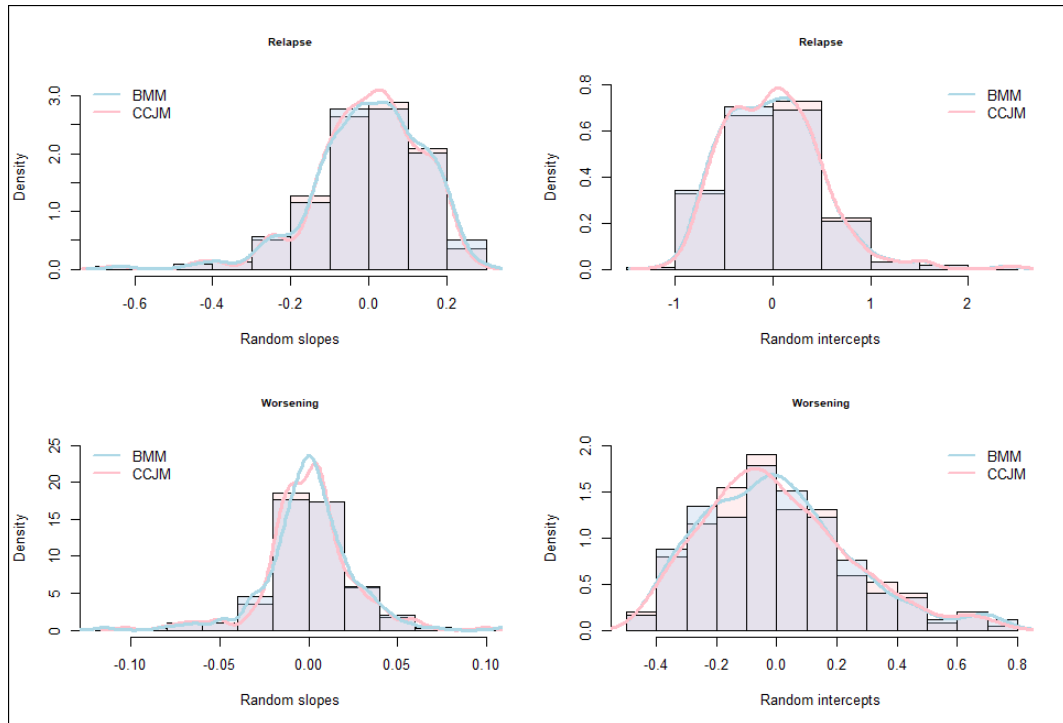

**Figure S5.** Comparing the distribution of random intercepts and random slopes generated from Bayesian mixed-effects models with those from the constant coefficient joint models.



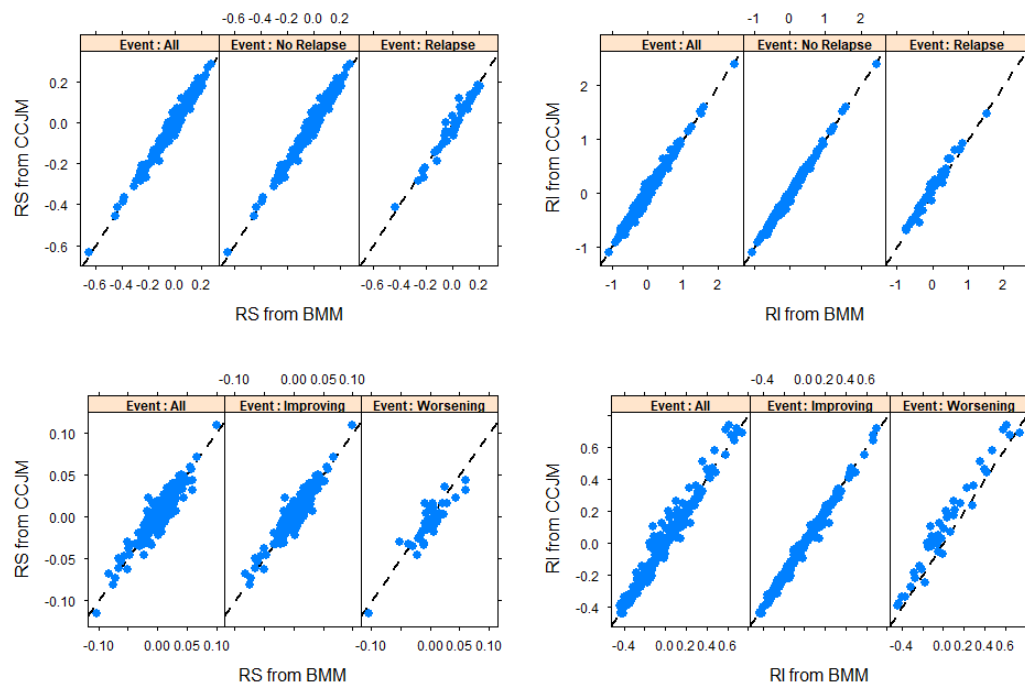

**Figure S6.** High degree of correlation between random intercepts and random slopes indicate good predictions
